# Supplementary material
Source: PubMed Central journal article supplement (PMC5340331)
Supplement: 1169TableS1.pdf [file 1169TableS1.pdf]

**Table S1: Strain list for this study**

| Strains   | Relevant genotypes                                                                                                             | Reference    |
|-----------|--------------------------------------------------------------------------------------------------------------------------------|--------------|
| CRY1      | <i>MATa ura3-1 his3-11,15 leu2-3,112 trp1-1 ade2-1 can1-100</i>                                                                | Lab stock    |
| YYW391    | <i>MATa bub1-ΔK-3HA- Sphis5<sup>+</sup></i>                                                                                    | This study   |
| 3024-4-1  | <i>MATa PDS1-18myc::LEU2</i>                                                                                                   | This study   |
| 2024-9-3  | <i>MATa sgo1Δ::KanMX PDS1-18myc::LEU2</i>                                                                                      |              |
| 3024-5-3  | <i>MATa bub1-ΔK-3HA- Sphis5<sup>+</sup> PDS1-18myc::LEU2</i>                                                                   | This study   |
| YYW141    | <i>MATa promURA3::tetR::GFP-LEU2 CENIV::tetOX448::URA3 TUB1-mCherry::URA3</i>                                                  | Lab stock    |
| 3015-1-4  | <i>MATa bub1-ΔK-13myc-Sphis5<sup>+</sup> promURA3::tetR::GFP-LEU2 CENIV::tetOX448::URA3 TUB1-mCherry::URA3</i>                 | This study   |
| 2848-8-3  | <i>MATa dam1(S257D S265D S292D)::KanMX PDS1-18myc::LEU2</i>                                                                    | Lab stock    |
| 3024-3-3  | <i>MATa dam1(S257D S265D S292D)::KanMX bub1-ΔK-3HA- Sphis5<sup>+</sup> PDS1-18myc::LEU2</i>                                    | This study   |
| 2849-4-1  | <i>MATa MAD1-HA3-URA3</i>                                                                                                      | Lab stock    |
| 3014-2-2  | <i>MATa bub1-ΔK-13myc- Sphis5<sup>+</sup> MAD1-HA3-URA3</i>                                                                    | This study   |
| 3014-1-3  | <i>MATa bub1-ΔK-13myc- Sphis5<sup>+</sup> dam1(S257D S265D S292D)::KanMX MAD1-HA3-URA3</i>                                     | This study   |
| 2769-1-2  | <i>MATa dam1(S257D S265D S292D)::KanMX MAD1-HA3-URA3</i>                                                                       | Lab stock    |
| 2850-5-3  | <i>MATa sgo1Δ::TRP1 MAD1-HA3-URA3</i>                                                                                          | Lab stock    |
| 2850-1-2  | <i>MATa sgo1Δ::TRP1 dam1(S257D S265D S292D)::KanMX MAD1-HA3-URA3</i>                                                           | Lab stock    |
| SC213     | <i>MATa (hta1-htb1)Δ:LEU2 (hta2-htb2)Δ:TRP1 pJH55(HTA1WT-HTB1-HIS-CEN)</i>                                                     | Watanabe lab |
| SC214     | <i>MATa (hta1-htb1)Δ:LEU2 (hta2-htb2)Δ:TRP1 pJH55(HTA1(121A)-HTB1-HIS-CEN)</i>                                                 | Watanabe lab |
| 3102-4-3  | <i>MATa (hta1-htb1)Δ:LEU2 (hta2-htb2)Δ:TRP1 pJH55(HTA1WT-HTB1-HIS-CEN) PDS1-18myc::LEU2</i>                                    | This study   |
| 3012-5-3  | <i>MATa dam1(S257D S265D S292D)::KanMX (hta1-htb1)Δ:LEU2 (hta2-htb2)Δ:TRP1 pJH55(HTA1WT-HTB1-HIS-CEN) PDS1-18myc::LEU2</i>     | This study   |
| 3108-2-3  | <i>MATa (hta1-htb1)Δ:LEU2 (hta2-htb2)Δ: TRP1 pJH55(HTA1(121A)-HTB1-HIS-CEN)PDS1-18myc::LEU2</i>                                | This study   |
| 3103-2-3  | <i>MATa dam1(S257D S265D S292D)::KanMX (hta1-htb1)Δ:LEU2 (hta2-htb2)Δ: TRP1 pJH55(HTA1(121A)-HTB1-HIS-CEN)PDS1-18myc::LEU2</i> | This study   |
| YYW402    | <i>MATa rts1Δ:: Sphis5<sup>+</sup>3 promURA3::tetR::GFP-LEU2 CENIV::tetOX448::URA3 TUB1-mCherry::URA3</i>                      | This study   |
| 3065-2-3  | <i>MATa rts1Δ::Sphis5<sup>+</sup> PDS1-18myc::LEU2</i>                                                                         | This study   |
| 3065-1-4  | <i>MATa rts1Δ::Sphis5<sup>+</sup> dam1(S257D S265D S292D)::KanMX PDS1-18myc::LEU2</i>                                          | This study   |
| YYW443    | <i>MATa sgo1Δ::URA3</i>                                                                                                        | This study   |
| YYW444    | <i>MATa SGO1-HIS3-URA3</i>                                                                                                     | This study   |
| YYW445    | <i>MATa sgo1-N511-HIS3-URA3</i>                                                                                                | This study   |
| YYW446    | <i>MATa sgo1-4A-HIS3-URA3</i>                                                                                                  | This study   |
| 3341-10-1 | <i>MATa SGO1-HIS3-URA3 promURA3::tetR::GFP-LEU2 CENIV::tetOX448::URA3 TUB1-mCherry::URA3</i>                                   | This study   |
| 3358-1-1  | <i>MATa sgo1Δ::URA3 promURA3::tetR::GFP-LEU2 CENIV::tetOX448::URA3 TUB1-mCherry::URA3</i>                                      | This study   |
| 3342-9-1  | <i>MATa sgo1-N511-HIS3-URA3 promURA3::tetR::GFP-LEU2 CENIV::tetOX448::URA3 TUB1-mCherry::URA3</i>                              | This study   |
| 3343-8-1  | <i>MATa sgo1-4A-HIS3-URA3 promURA3::tetR::GFP-LEU2 CENIV::tetOX448::URA3 TUB1-mCherry::URA3</i>                                | This study   |
